# Supplementary material for: Effectiveness of Combinational Treatments for Alzheimer’s Disease with Human Neural Stem Cells and Microglial Cells Over-Expressing Functional Genes
Source: Int J Mol Sci. 2023 May 31;24(11):9561. doi: 10.3390/ijms24119561 (PMC10253978; doi:10.3390/ijms24119561)
Supplement: Supplementary file 1 [file ijms-24-09561-s001.zip › ijms-2360021-supplementary.pdf]

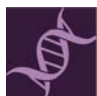

Manuscript ijms-2360021

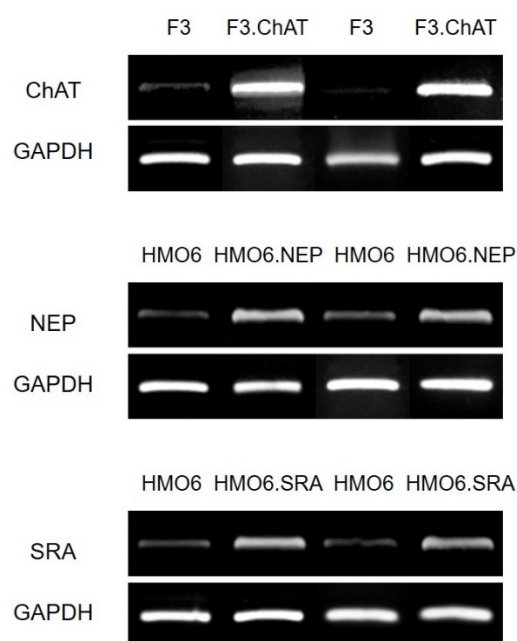

**Supplementary Figure S1.** RT-PCR analysis of mRNA of ChAT, NEP and SRA in the established cells, F3.ChAT, HMO6.NEP and HMO6.SRA, respectively. Primer sequences: ChAT forward: 5'-CTGTGCCCCCTTCTAGAGC-3'; reverse: 5'-CAAGTTGGTGTCCCTGG-3', NEP: forward: 5'-ATCAGCCTCTCGGTCCTTGT-3'; reverse: 5'-TGGAAGACAGCGCAAGACTC-3', SRA forward: 5'-AGGAGATCGAGGTCCCACTG-3'; reverse: 5'-TGTTTCCACTCCCCTTTTCC-3' for SRA.

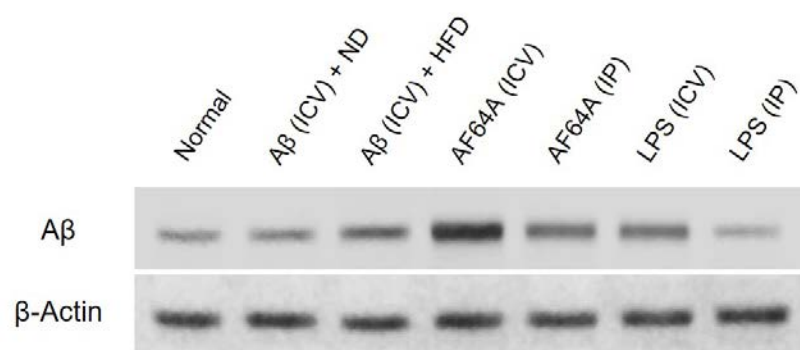

**Supplementary Figure S2.** Western blot analysis of brain A $\beta$  using a primary antibody specific for A $\beta$  and a secondary goat anti-rabbit IgG conjugated with horseradish peroxidase.

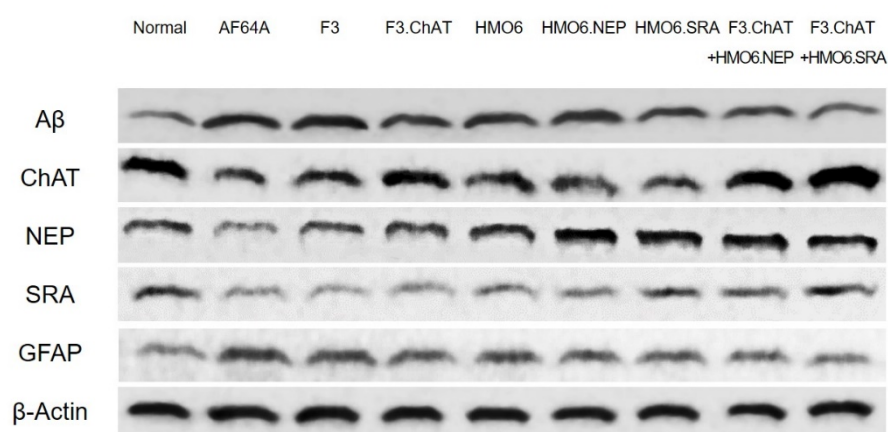

**Supplementary Figure S3.** Western blot analysis of brain A $\beta$  functional proteins using primary antibodies specific for A $\beta$ , ChAT, NEP, SRA or GFAP and secondary goat anti-rabbit IgG conjugated with horseradish peroxidase.

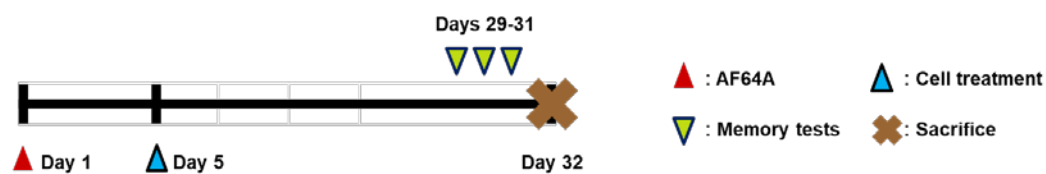

- o Learning & memory tests: passive avoidance & water-maze performances
- o ACh and A $\beta$  concentrations: ELISA
- o Survival and expression of functional genes of injected cells
  - : immunohistochemistry [human mitochondria (hMito), ChAT, NEP, MSRA]
- o A $\beta$  & GFAP levels: western blotting

**Supplementary Figure S4.** Experimental design displaying the induction of cognitive dysfunction with AF64A, cell treatment, memory tests and analysis.
